# Supplementary material for: Digital Twin of Nonpregnant Human Uterus
Source: Research Square preprint supplement (doi:10.21203/rs.3.rs-6505611/v1), 2025-05-07
Supplement: Supplementary file 1 [file dbde7e187d512cdaa4457da8.docx]

**Supplementary Methodology**

1. Electrophysiology

The finite element model for electrophysiology was solved using Alya, a high-performance computing software developed at the Barcelona Supercomputing Center, employing the monodomain approximation to the anisotropic electrical propagation ***(1,2)***. This software was designed from scratch to run efficiently in high performance computers, with a tested scalability of up to 100.000 cores ***(3,4,5,6,7)***. Briefly, the equations for electrical propagation and the system to be solved are:

(1)

where *Cm* refers to the membrane capacitance; φ is the transmembrane potential, *G* is the conductivity tensor which defines the anisotropic conductivity in the uterine muscle; *Sv* is the surface to volume ratio of the uterine cells; and Iion is the solution of the ODEs that define the cardiomyocyte ion channel model based on the one published by Rogers & McCulloch ***(8)***; *f* is this system of ODEs, which is dependent on the transmembrane potential φ and a set of parameters *p*. Zero flux is defined at the boundary *Γ* of the domain. A Yanenko operator splitting technique was applied to discretize the system. The ODEs system is solved using a forward Euler explicit scheme with a time step of 1e−4. The PDE is solved using a Crank-Nicolson scheme with a time step of 1e−4. The problem domain is partitioned using METIS ***(9)*** into several sub-domains and parallelized using MPI.

1. **Solid Mechanics**

In this section, we follow (10) for the basic CSM description. Let us define *Xj* a material point in the reference (or material) configuration and *xi* the corresponding point in the deformed configuration. The equation of balance of momentum with respect to the reference configuration can be written as follows:

where *ui* is the unknown, *𝜌s* is the tissue density (with respect to the reference volume). Tensor *Pji* and vector *bi* stand for, respectively, the first Piola-Kirchoff (nominal stress) and the distributed body force in the undeformed configuration.

The Cauchy stress is related to the nominal stress through the deformation gradient tensor. is the Jacobian determinant. In contractile muscle models, (11) stress is assumed to be a combination of passive and active parts:

Where is the normalized vector along the fibers. Following Holzapfel and Ogden, (12) the passive part is modeled as a slightly compressible, elastic, invariant-type material, and through a transverse isotropic exponential strain energy function *W*(***b***). The energy function *W*(***b***) relates to the Cauchy stress to the right Cauchy-Green deformation ***b*** and the strain invariants:

The strain invariants *I*1 and *I*4 represent the non-collagenous material and the muscle fibers stiffness, respectively. Parameters *a, b, af, bf* are determined experimentally.(13) *K* sets the compressibility. Vector ***f*** defines the fiber direction. As the model is indeed slightly compressible, we neglect the anisotropy effects for the compressible term.

While some authors solve the mechanical problem as a quasi-static approach, (14-17) we solve a dynamical approach as independently proposed in Lafortune et al (13) and Fritz et al.(18) Dynamically solved, cardiac tissue appears to be viscoelastic. In order to improve convergence and avoid numerical spurious oscillations typical of hyperelastic materials solved dynamically, we use a Rayleigh damping strategy.(19) This damping replaces viscoelastic effects in the material model.

After using FEM and FDM to discretize in space and time the solid mechanics differential equations, and including the

Rayleigh damping term, we obtain:

where ***a***, ***v***, and ***u*** are respectively the acceleration, speed, and displacement, and **B** is a source term. In this equation, **M** is the mass matrix, **K**(***u***) is the stiffness matrix, and is the Rayleigh damping term. *𝛼* and *𝛽* are chosen as a function of the frequencies to damp. In the general form of the Rayleigh damping term **C** is proportional to the mass **M** and the stiffness **K** of the structure. Stiffness proportional damping has the effect of increasing the damping in the higher modes of the solid, for which there is no physical justification.(20) This is why both in Lafortune et al (13) and Fritz et al (18) it is proposed to use and . After numerical experiments, we chose and Hz.

The frequency target *𝜔* is obtained as in Lafortune et al,(13) after a spectral analysis on a large number of simulations on smaller pieces of tissue with the same material model and no Rayleigh damping.

The resulting system is solved explicitly. The explicit scheme then becomes

where the viscous force and the internal force is . If ***Md*** is the diagonal mass matrix, the resulting explicit scheme is Belytschko et al (10):

The superscripts “*n*” and “*n* + 1” indicate that the variables are evaluated at time *tn* and *tn*+1, respectively.

**2.2.4 Electromechanical coupling**

The electromechanical coupling is considered bidirectional regarding the geometric domain. In the electromechanical direction, the depolarization of the cell membrane triggers the mechanical deformation of the contractile cells, modeled as the stress active part (). In this paper, we use a Hunter-McCulloch model,(21) which assumes that the active stress is produced only in the direction of the fiber and depends on the calcium concentration of the cell:

where is the calcium concentration for 50*%* of *n* is a coefficient that controls the shape of the curve, is the maximum tensile stress generated at the maximum extension ratio 𝜆 = 1 and β is a parameter that scales the active stress.

When solving in the deformed configuration, matrices and vectors are assembled inside a subroutine with reference nodal positions as inputs. The deformed electrophysiology is solved by simply reassigning the input to . In any case and even recomputing its matrices every time step, electrophysiology assembly is way less expensive in computational terms than solid and fluid mechanics.

In the deformed configuration, and as described in Quarteroni et al (16) and Colli Franzone et al, (22) the space derivatives using the nodal coordinates on the deformed configuration and, instead of ***G*** obtained, a transformed diffusion matrix ***G****d*:

**2.2.5 Fluid mechanics in a deformable mesh**

Computational fluid dynamics (CFD) inside cavities and vessels is modeled by the incompressible flow Navier-Stokes equations for a Newtonian fluid on a deformable mesh using an arbitrary Lagrangian-Eulerian (ALE) scheme. Flow equations are:

where *𝜇* is the viscosity, *𝜌f* is the fluid density, v*i* is the velocity, *p* is the mechanical pressure and is the mesh velocity.

To solve these equations in a compact manner, lets define **v** ∶= *vi* and let ***𝝐*** and ***𝝈*** be the velocity rate of deformation and the stress tensors respectively, defined as follows:

With this, we can define vector with the unknowns , a differential operator and a force term **F** as follows:

And

where the domain velocity **v***d* becomes the mesh velocity **v***m* once the equation is discretized. If the matrix , where **I** is the identity tensor, we can write the incompressible Navier-Stokes in the compact form:

The numerical model is based on FEM for space and FDM for the time, using the variational multiscale (VMS) technique(23) to stabilize convection and pressure. The formulation is obtained by splitting the unknowns into grid and a subgrid scales components, . This subgrid scale is also modeled. Lets define the Navier-Stokes residue as:

Then, the expression

is considered for the stabilization where ***𝝉*** is a diagonal matrix, depending on the convection velocity. The resulting system is solved through a velocity-pressure splitting strategy. Time discretization is based on second order backwards differences, and linearization is carried out using Picard method. At each time step, the system

must be solved for velocity (**u**) and pressure (**p**) vectors. In order to solve this system split approach is used.(24) The Schur complement is obtained and solved with an Orthomin(1) algorithm.(25) To do so, the momentum equation is solved twice using GMRES (generalized minimal residual method) and the continuity equation is solved with the deflated conjugate gradient (DCG) algorithm.

The ALE scheme requires the solution of another discretized partial differential equation for the mesh movement. We use the technique proposed in,(26) which is robust and allows to preserve mesh structure at boundary layers or around fine grain geometry features. Mesh movement is governed by the following Laplacian equation:

which is solved using FEM to discretize the space. In this equation, *bi* are the components of the displacement at each point for the domain. The factor *𝛼e* controls the mesh distortion depending on the minimum and maximum element volumes in the mesh:

In this way, while small elements remain almost undeformed, large elements suffer the largest deformations. This equation is solved with a deflated conjugate gradient algorithm,(27) and it is computationally cheap, because diffusion coefficients are computed only once at preprocess. Arbitrary Lagrangian-Eulerian (ALE) boundary conditions at the contact surface are set through the nodal displacement from solid mechanics problem. The equation is discretized by FEM in space and FDM in time, resulting in a simple diffusion problem.

**2.2.6 Fluid-structure interaction**

Mechanical deformation and fluid dynamics is coupled at the wet surface,(28-31) which is the contact boundary or interface between blood (simulated using CFD) and tissue (simulated using CSM). At the discrete level, continuity of displacements , ) and normal stresses (,) for CFD and CSM, respectively, in the wet surface, Γ*c* must be enforced:

The normal stresses translated as a surface force applied in the contact boundary Γ*c* as follows:

where *nj* is the normal to the surface. The mesh is constructed to be conforming, having coincident nodes at Γ*c*, avoiding interpolation approximations that may lead to non conservativeness of the coupling variables.

There are three requirements for the FSI algorithm in this problem. Firstly, as the solid and fluid densities are very similar and the added mass instability (31,32) is prone to appear, the algorithm must be robust enough to tackle this issue. Secondly, due to the computational strategy adopted for the multi-physics simulations, we need a strongly coupled staggered approach. Thirdly, as both fluid and solid mechanics problems are potentially very large, both problems should run following a parallel programming strategy, which requires a coupling algorithm efficient enough to avoid bottlenecks in the point-to-point parallel communications. To overcome these issues, a modified version of the interface quasi-Newton (IQN) algorithm (33) was developed, named as compact IQN (CIQN), presented in Santiago et al. (34)

Briefly explained, the problem is split in the fluid and solid domains with a Dirichlet-Neumann decomposition approach. In this way, the CSM problem can be defined as and the CFD problem as , where the Greek subindex represents the degrees of freedom (DoF). With this, the fixed-point algorithm for each iteration can be written as or *.* In a generic manner, the problem can be stated as . We can define the next iterate as. The unknown increment can be approximated as follows:

Where is a matrix containing in each column the unknown increments . Finally, is obtained by solving the following problem:

Where is the residue for the interface problem and *V𝛼j* contains in each column the residual increments for the interface problem .

**2.3 Computational aspects and parallel implementation**

We follow a multi-code strategy, in which two instances of Alya are simultaneously executed (see Figure 1), computing the fluid mesh deformation (ALE problem) and fluid mechanics (CFD problem) in one instance and electrophysiology (EP problem) and solid mechanics (CSM problem) in the other instance. At run time, each instance is partitioned in subdomains, being each subdomain pinned to anMPI task. In order to have efficient communication among the instances, an MPI point-to-point communication scheme is set. This scheme allows that each of the subdomains with at least one element on the wet surface will communicate *only* with its subdomain wet surface element counterpart at the other material, as shown in Figure 1. In the figure, Γ*c* is the wet surface separating two different materials (ie, fluid flow and tissue) Ω*a* and Ω*b*. Each material is being simulated on a different parallel Alya instance and partitioned in three subdomains.

Therefore, in Figure 1 example, the joint run uses a total of six MPI-tasks. Following an efficient MPI point-to-point communication scheme and according to the figure, subdomain in the upper material must only communicate with and only with . The solution scheme is shown in center of Figure 1. After the initialization, for each time step, the parallel solvers are executed in a staggered way: electrophysiology /mechanical deformation on the “tissue” Alya instance and fluid mesh deformation / fluid mechanics on the “flow” Alya instance:

1. Instance Tissue:

*(a)* Solve electrophysiology, update activation potential and ion concentration using the last solid displacements

*(b)* Solve solid mechanics, update solid displacement using the last ion concentration


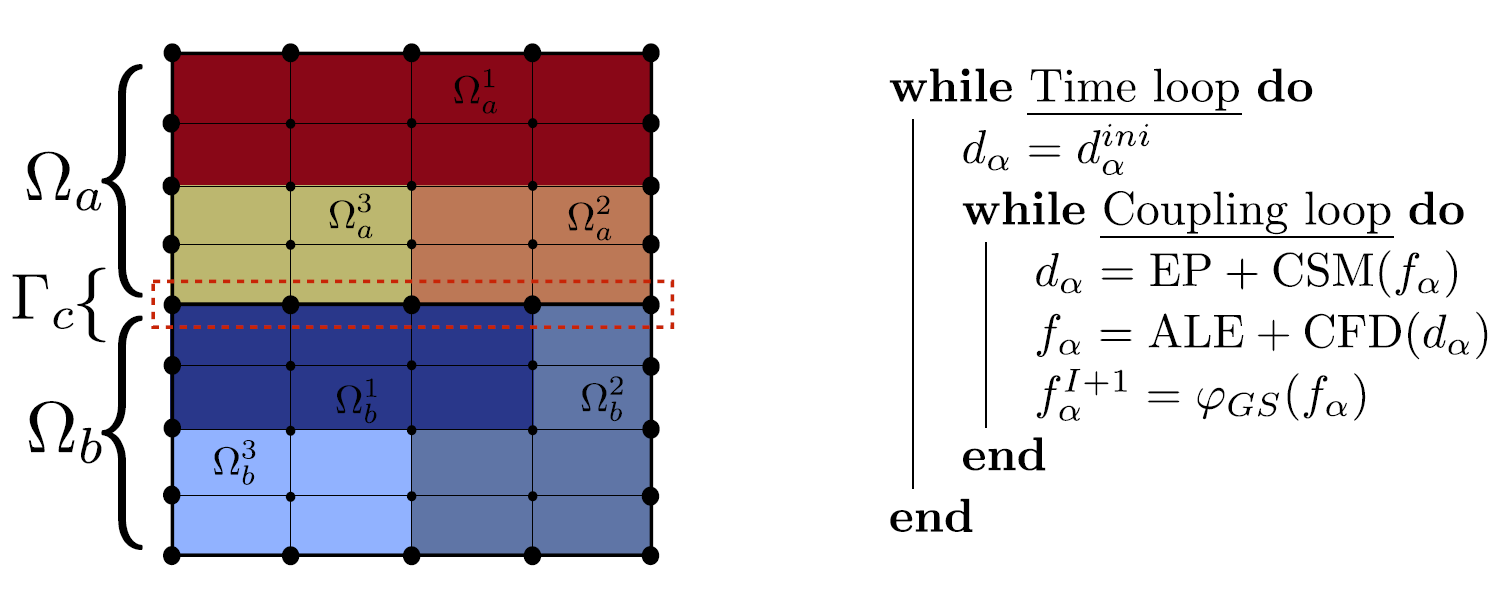


**FIGURE 1** High performance computing (HPC) implementation. Left: Physical subdomains Ω*a* and Ω*b* in contact by the wet surface Γ*c*, where each subdomain is subdivided in three partitions. Right: Gauss-Seidel scheme, where *𝜑GS* represents the relaxation algorithm, *d𝛼* and *f𝛼* the displacements and forces in the interface, and electrophysiology (EP), computational solid mechanics (CSM), arbitrary Lagrangian-Eulerian (ALE), and computational fluid dynamics (CFD) the different problems involved

**
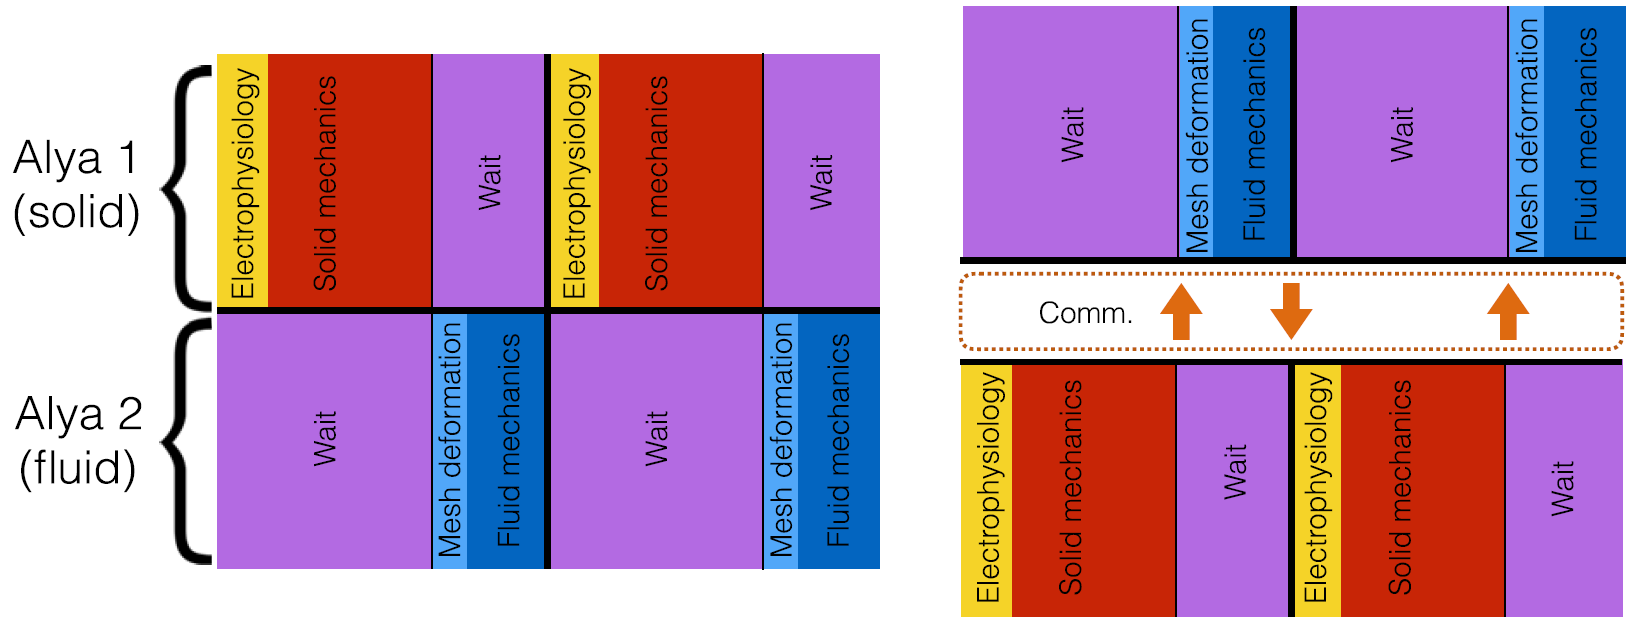
**

**FIGURE 2** High performance computing (HPC) implementation. Schematic trace for the Gauss-Seidel approach. Left: the parallel solvers

are executed in a block manner. Right: MPI communication points in the used scheme

2. Instance Tissue transfers the wet surface nodal velocity to the Instance Blood.

3. Instance Blood:

*(a)* Solve mesh deformation, update mesh displacements

*(b)* Solve fluid mechanics, update pressure velocity and pressure

4. Instance Blood transfers the wet surface nodal force to the Instance Tissue.

5. Repeat.

Each iterate is described on the schematic trace in Figure 2.

**2.4 Particle transport**

Particle and fluid transport are solved simultaneously in Alya. The parallelization scheme for particle transport is radically different to that of the fluid, which can lead to an important miss-balance. Houzeaux et al. (35-37) described both the implementation method and the strategy to avoid bottlenecks.

Particle transport was simulated in a Lagrangian frame of reference, following each individual particle. The main assumptions of the model were:

- Particles were sufficiently small to neglect their effect on the flow i.e. one way coupling;
- Particles do not interact with each other;
- Particle rotation was negligible;
- Thermophoretic forces were negligible;
- The force considered was drag ***F****d*

Let xp, up, ap and mp be the position, velocity, acceleration and mass of particle p, respectively. Particles are transported solving the Newton’s second law, and by applying a series of forces: drag, lift, gravity and buoyancy. Brownian motion can be considered as well. The total force on the particle is referred to as Fp, and . The time integration is based on the Newmark’s method. Particles are transported from time ti to tf, with being the time step size of the fluid simulation. In that time range, an adaptive time step strategy is used. Thus, particles are transported independently, with different time step sizes , until they reach the final time tf. Let n denote the time step of the particle (that is, n = 0 when t = ti). Given an acceleration an+1 , the Newmark’s scheme reads

where β and γ enable one to control the accuracy and stability of the scheme (38). The drag force (39) and lift force (40) depend on the particle and fluid velocities. The first equation is therefore strongly nonlinear. In this work, a Newton–Raphson scheme is used to converge the particle velocity equation. Once the velocity is obtained, the position is then updated using the last equation. The algorithm consists, therefore, of a Newmark/Newton–Raphson scheme (41). Due to parallelisation, performance and accuracy issues, there exist some constraints on the time step. First, particles are not allowed to cross more than one element from one time step to the next one, for two reasons: parallelisation constraint (see Hybrid Parallelisation section); consistency with the discretisation scheme used to solve the Navier–Stokes equations. Second, if the Newmark/Newton–Raphson does not converge, time is automatically decreased. Third, in order to control the error, an adaptive time step strategy is applied based on an error estimate (42,43,44).

The equation for the drag force assumed the particle reached its terminal velocity and is given by , (5) where Re is the particle Reynolds number involving its relative velocity with the fluid: . The drag coefficient used Ganser’s formula [39]:

1.5 Particle Hybrid Parallelisation

The parallelisation of the particle transport is based on a hybrid MPI+OpenMP paradigm. As far as the MPI parallelisation is concerned, a particle is located in one particular element of the mesh and therefore belongs to exclusively one subdomain. The mechanism to migrate one particle to another subdomain is through an MPI message whenever a particle falls into a halo element (an element from another subdomain sharing at least one node with an interface element) of the subdomain it belongs to. This is possible because we constrain the particles not to travel through more than one element from one time step to the next one. Then, the OpenMP paradigm is used to parallelise the loop over particles inside each MPI process. The hybrid parallelisation strategy is illustrated in Algorithm 1. The variable Nover counts the number of particles that have reached their final time steps over all the MPI partitions. Therefore, the MPI communication loop (from step 2 to step 25) is active until all particles have reached time step tf, that is, when Nover = Np. Particles falling in halo elements are accumulated in a stack and then sent to the corresponding neighbours at the end of the MPI loop. The OpenMP paradigm used to parallelise the loop over particles inside each MPI subdomains uses a dynamic scheduling with chunks of size 1000.

Algorithm 1: Hybrid parallel algorithm for the parallel transport of Np particles.

1: Nover = 0, t p = ti for all particles p

2: **while** Nover ≠ Np do

3: !$OMP PARALLEL DO SCHEDULE (DYNAMIC,1000)

4: !$OMP ...

5: **for** Particles p in my subdomain **do**

6: in_halo = . f alse.

7: **while** tp ≠ tf and .not. in_halo **do**

8: Update particle dynamical properties using the Newmark/Newton-Raphson scheme

9: **if** particle p is in halo element **then**

10: Save particle to be sent in stack

11: in_halo = .true.

12: **else**

13: Update time step size δtp

14: Update time: tp = tp + δtp

15: **end if**

16: **end while**

17: **if** .not. in_halo **then**

18: Nover = Nover + 1

19: **end if**

20: **end for**

21: !$OMP END PARALLEL DO

22: MPI_AllReduce(Nover)

23: MPI_Send particles in halo elements to corresponding neighbors

24: MPI_Recv particles from neighbors

25: **end while**

The hybrid paradigm is very effective in terms of computational performance in the particle transport scenario. On the one hand, MPI parallelisation is, in general, an efficient solution for the fluid, in which computation tends to be relatively balanced using partitioners like METIS. On the other hand, particles concentration in the domain has no guarantee to be homogenous and they may be located in a very small portion of the computational domain. In this case, only few MPI processes would be working, so load is unbalanced. In the particle’s approach, OpenMP allows to distribute a balanced number of particles per thread. In the present case, as particles are independent, OpenMP parallelisation is very efficient.

**Bibliography**

1. Santiago A et al (2018) Fully coupled fluid-electro-mechanical model of the human heart for supercomputers. International Journal for Numerical Methods in Biomedical Engineering 34(12): e3140
2. Margara F et al (2021) In-silico human electro-mechanical ventricular modelling and simulation for drug-induced pro-arrhythmia and inotropic risk assessment. Progress in Biophysics and Molecular Biology 159: 58–74
3. Houzeaux G et al (2009) A massively parallel fractional step solver for incompressible flows. Journal of Computational Physics 228(17): 6316-6332
4. Vázquez M et al (2016) Alya: Multiphysics engineering simulation toward exascale. Journal of Computational Science 14: 15–27
5. Vázquez M et al (2011) A massively parallel computational electrophysiology model of the heart. International Journal for Numerical Methods in Biomedical Engineering 27(12): 1911–1929
6. Uekermann B (2016) Partitioned Fluid-Structure Interaction on Massively Parallel Systems. Doctoral thesis, Technische Universität München
7. Casoni E et al (2015) Alya: Computational solid mechanics for supercomputers. Archives of Computational Methods in Engineering22: 557–576
8. Jack M Rogers and Andrew D McCulloch. A collocation-galerkin finite element model of cardiac action potential propagation. IEEE Transactions on Biomedical Engineering, 41(8):743–757, 1994.
9. Karypis G, Kumar V (1998) Multilevel-way partitioning scheme for irregular graphs. Journal of Parallel and Distributed Computing 48(1): 96–129
10. 93. Belytschko T, LiuWK, Moran B, Elkhodary K. *Nonlinear Finite Elements for Continua and Structures*, No Longer used: Wiley; 2013.
11. 94. Humphrey JD. Continuum biomechanics of soft biological tissues. *In Proceedings of the Royal Society of London A: Mathematical, Physical and Engineering Sciences. The Royal Society*. January 2003;459(2029):3-46.
12. 38. Holzapfel GA, Ogden RW. Constitutive modelling of passive myocardium: a structurally based framework for material characterization. *Philos Transact A Math Phys Eng Sci*. 2009;367(1902):3445-75.
13. 80. Lafortune P, Arís R, Vázquez M, Houzeaux G. Coupled electromechanical model of the heart : parallel finite element formulation. *Int J Numer Methods Biomed Eng*. 2012;28:72-86.
14. 54. Gao H, Wang H, Berry C, Luo X, Griffith BE. Quasi-static image-based immersed boundary-finite element model of left ventricle under diastolic loading. *International journal for numerical methods in biomedical engineering*. 2014nov;30(11):1199-1222. available at NIHMS150003.
15. 63. De Vecchi A, Nordsletten DA, Razavi R, Greil G, Smith NP. Patient specific fluid-structure ventricular modelling for integrated cardiac care. *Med Biol Eng Comput*. 2013;51(11):1261-1270.
16. 72. Quarteroni A, Lassila T, Rossi S, Ruiz-Baier R. Integrated heart : coupling multiscale and multiphysics models for the simulation of the cardiac function. *Comput Methods Appl Mech Eng*. 2016;1:345-407.
17. 95. Land S, Gurev V, Arens S, et al. Verification of cardiac mechanics software: Benchmark problems and solutions for testing active and passive material behaviour. *Proc Math Phys Eng Sci / Royal Soc*. 2015;471(2184):20150641.
18. 96. Fritz T, Wieners C, Seemann G, Steen H, Dossel O. Simulation of the contraction of the ventricles in a human heart model including atria and pericardium: finite element analysis of a frictionless contact problem. *Biomech Model Mechanobiol*. 2014;13(3):627-641.
19. 97. LiuWK, Belytschko T. *Nonlinear Finite Elements for Continua and Structures*. New York, US:Wiley; 2000.
20. 98. Wilson EL. *Three-Dimensional Static and Dynamic Analysis of Structures*. 3rd Computers and Structures, ed. Berkeley: Computers and Structures; 2002.
21. 99. Hunter PJ, McCulloch AD, Ter Keurs HEDJ. Modelling the mechanical properties of cardiac muscle. *Prog Biophys Mol Biol*.1998mar;69(2-3):289-331.
22. 101. Colli Franzone P, Pavarino LF, Scacchi S. Bioelectrical effects of mechanical feedbacks in a strongly coupled cardiac electro-mechanical model. Math Models Methods Appl Sci. 2016;26(01):27-57.
23. 102. Houzeaux G, Principe J.Avariational subgrid scale model for transient incompressible flows. Int J Comput FluidDyn. 2008;22(3):135-152.
24. 82. Houzeaux G, Vázquez M, Aubry R, Cela JM. A massively parallel fractional step solver for incompressible flows. J Comput Phys. 2009;228(17):6316-6332.
25. 81. Houzeaux G, Aubry R, Vázquez M. Extension of fractional step techniques for incompressible flows: the preconditioned Orthomin (1) for the pressure Schur complement. *Comput Fluids*. 2011;44(1):297-313.
26. 103. Calderer R, Masud A. A multiscale stabilized ALE formulation for incompressible flows with moving boundaries. Comput Mech. 2010;46(1):185-197.
27. 104. Lohner R, Mut F, Cebral JR,Aubry R, Houzeaux G. Deflated preconditioned conjugate gradient solvers for the pressure-Poisson equation: extensions and improvements Rainald. Int J Numer Methods Eng. 2010;87:2-14.
28. 105. Ball RE, Citerley RL. Fluid mass matrices for thin shell-of-revolution tanks. J Press Vessel Technol. 1980;102:387-393.
29. 106. Au-Yang MK, Galford JE. A structural priority approach to fluid-structure interaction problems. Trans Am Math Soc. 1981;103:142-150.
30. 107. Zilliacus S. Fluid-structure interaction and ADINA. Comput Struct. 1980;5-6(1):763-773.
31. 108. Forster C, Wall WA, Ramm E. Artificial added mass instabilities in sequential staggered coupling of nonlinear structures and incompressible viscous flows. Comput Methods Appl Mech Eng. 2007;196(7):1278-1293.
32. 109. Causin P, Gerbeau JF, Nobile F. Added-mass effect in the design of partitioned algorithms for fluid-structure problems. Comput Methods Appl Mech Eng. 2005;194(42-44):4506-4527.
33. 110. Degroote J, Bathe KJ, Vierendeels J. Performance of a new partitioned procedure versus a monolithic procedure in fluid-structure interaction. Comput Struct. 2009;87(11-12):793-801.
34. 111. Santiago A, Zavala M, Vázquez M, Cajas JC, Houzeaux G. HPC-based compact interface quasi-Newton algorithm for fluid-structure interaction. SIAM J Sci Comput. 2017.
35. Houzeaux, G., R. Aubry, and M. Vázquez. 2011. “Extension of Fractional Step Techniques for Incompressible Flows: The Preconditioned Orthomin(1) for the Pressure Schur Complement.” Computers & Fluids 44: 297–313.
36. Houzeaux, G., and J. Principe. 2008. “A Variational Subgrid Scale Model for Transient Incompressible Flows.” International Journal of Computational Fluid Dynamics 22 (3): 135–152.
37. Houzeaux, G., M. Vázquez, R. Aubry, and J.M. Cela. 2009. “A Massively Parallel Fractional Step Solver for Incompressible Flows.” Journal of Computational Physics 228 (17): 6316–6332.
38. Newmark, N.M. 1959. “A Method of Computation for Structural Dynamics.” Journal of Engineering Mechanics 85: 67–94.
39. Ganser, G. 1993. “A Rational Approach to Drag Prediction of Spherical and Nonspherical Particles.” Powder Technology 77: 143–152.
40. Li, A., and G. Ahmadi. 1992. “Dispersion and Deposition of Spherical Particles from Point Sources in a Turbulent Channel Flow.” Aerosol Science and Technology 16 (4): 209–226.
41. Park, K.C. 1975. “An Improved Stiffly Stable Method for Direct Integration of Nonlinear Structural Dynamic Equations.” Journal of Applied Mechanics 42 (2): 464–470.
42. Kuhl, D., and G. Meschke. 2004. “Robust Time Integration Schemes for Durability Analyses.” WCCM VI in conjunction with APCOM-04, Beijing, China, September 5–10.
43. Schweizerhof, K., J. Neumann, and S. Kizio. 2004. “On Time Integration Error Estimation and Adaptive Time Stepping in Structural Dynamics.” Proceedings in Applied Mathematics and Mechanics, Vol. 435–438.
